# Supplementary material for: Defining a Distinct Immunotherapy Eligible Subset of Patients with Cancer of Unknown Primary Using Gene Expression Profiling with the 92‐Gene Assay
Source: PubMed Central journal article supplement — Oncologist. 2020 Sep 23;25(11):e1807–11. doi: 10.1634/theoncologist.2020-0234 (PMC7648339; doi:10.1634/theoncologist.2020-0234), 2020-09-23

Supplemental Figure for:  
Defining a distinct immunotherapy eligible subset of patients with cancer of unknown primary using gene expression profiling with the 92-gene assay  
Kanwal Raghav et al.

**Supplementary Figure 1. Methodology and case selection**

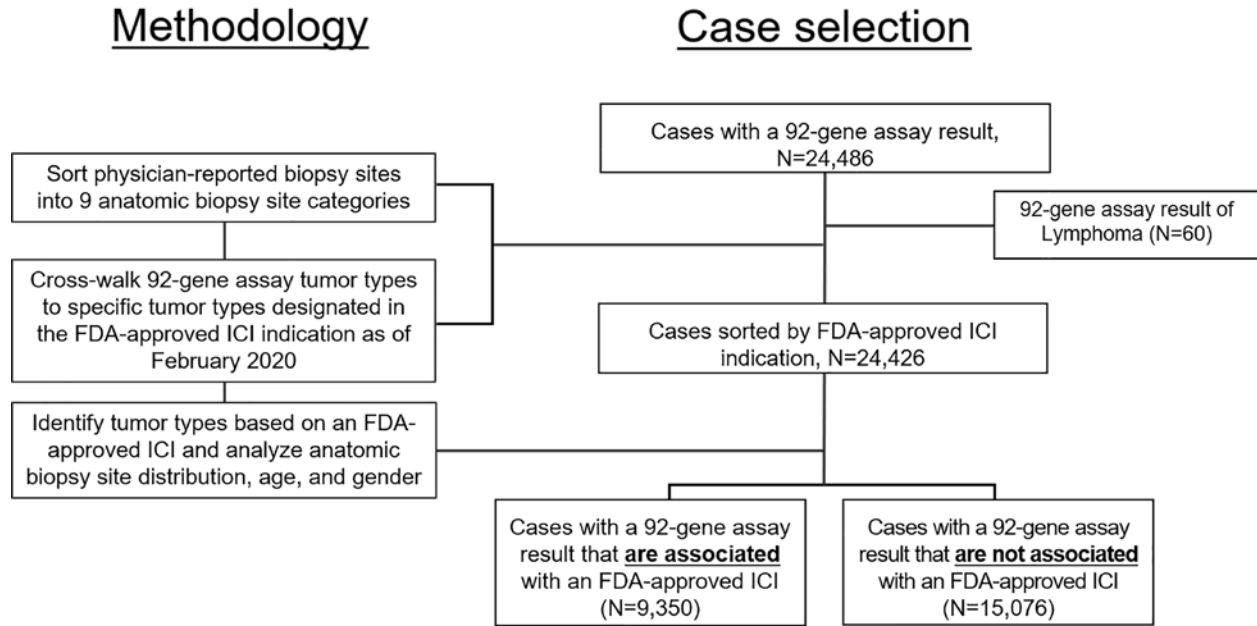

Supplement: ONCO-25-e1807-s001.pdf [file ONCO-25-e1807-s001.pdf]
